# Supplementary material for: The Differences in Non-Culprit Lesions Among Premenopausal, Perimenopausal, and Postmenopausal Women with Acute Coronary Syndrome
Source: Research Square preprint supplement (doi:10.21203/rs.3.rs-5965842/v1), 2025-03-27
Supplement: Supplementary file 1 [file 838ad093081f4f5fb58345d4.docx]

**Supplementary File**

**Supplementary Table 1. OCT findings of nonculprit lesions**

|  | Overall  (n=243) | Group T1  (n=29) | Group T2  (n=51) | Group T3  (n=163) | *P 1 vs 2* | *P 1 vs 3* | *P 2 vs 3* | *P 1vs 23* | *P 12 vs 3* |
| --- | --- | --- | --- | --- | --- | --- | --- | --- | --- |
| **Culprit vessel** |  |  |  |  |  |  |  |  |  |
| LAD | 85 (35.0) | 11 (37.9) | 16 (31.4) | 58 (35.6) |  |  |  |  |  |
| LCX | 80 (32.9) | 9 (31.0) | 17 (33.3) | 54 (33.1) |  |  |  |  |  |
| RCA | 78 (32.1) | 9 (31.0) | 18 (35.3) | 51 (31.3) |  |  |  |  |  |
| **Types of culprit plaques** |  |  |  |  |  |  |  |  |  |
| Plaque rupture | 16 (6.6) | 1 (3.4) | 2 (3.9) | 13 (8.0) | 0.859 | 0.382 | 0.427 | 0.475 | 0.268 |
| Plaque erosion | 65 (26.7) | 13 (44.8) | 8 (15.7) | 44 (27.0) | 0.017 | 0.098 | 0.098 | 0.031 | 0.943 |
| Calcified nodules | 16 (6.6) | 0 (0.0) | 0 (0.0) | 16 (9.8) | NA | NA | NA | NA | NA |
| Others | 146 (60.1) | 15 (51.7) | 41 (80.4) | 90 (55.2) | 0.029 | 0.738 | 0.003 | 0.369 | 0.045 |
| Lesion length, mm | 13.6 (9.7-18.2) | 11.4 (8.8-15.8) | 13.0 (9.7-17.7) | 13.6 (10.0-18.5) | 0.276 | **0.036** | 0.349 | **0.050** | 0.082 |
| Distal RLA, mm2 | 5.8 (4.5-7.7) | 6.0 (3.4-8.9) | 5.7 (4.2-8.1) | 5.8 (4.5-7.3) | 0.970 | 0.863 | 0.859 | 0.886 | 0.890 |
| Proximal RLA,mm2 | 7.1 (5.2-9.5) | 7.8 (4.5-10.5) | 6.7 (4.9-9.1) | 7.1 (5.4-9.4) | 0.366 | 0.863 | 0.228 | 0.710 | 0.550 |
| AS, % | 54.5 (44.9-61.8) | 51.0 (45.4-56.2) | 50.7 (42.6-57.7) | 54.8 (45.1-62.2) | 0.468 | 0.091 | 0.189 | 0.133 | 0.061 |
| DS, % | 32.2 (25.6-38.0) | 30.3 (26.0-34.1) | 31.2 (24.1-36.2) | 32.8 (25.8-38.8) | 0.434 | 0.105 | 0.292 | 0.143 | 0.094 |
| Meanl flow area,  mm2 | 4.9 (3.8-6.4) | 5.9 (3.4-7.1) | 4.6 (3.7-6.5) | 4.9 (3.9-6.2) | 0.195 | 0.294 | 0.508 | 0.255 | 0.962 |
| Minimal flow area, mm2 | 3.0 (2.2-4.1) | 3.4 (2.0-5.0) | 2.8 (2.2-4.2) | 3.0 (2.2-3.9) | 0.423 | 0.343 | 0.915 | 0.347 | 0.685 |
| **Plaque types** |  |  |  |  |  |  |  |  |  |
| Lipid plaque | 160 (65.8) | 20 (69.0) | 36 (70.6) | 104 (63.8) | 0.939 | 0.569 | 0.451 | 0.676 | 0.398 |
| Fibrous plaque | 46 (18.9) | 9 (31.0) | 15 (29.4) | 22 (13.5) | 0.888 | 0.065 | 0.034 | 0.072 | 0.003 |
| Calcified plaque | 37 (15.2) | 0 (0.0) | 0 (0.0) | 37 (22.7) |  |  |  |  |  |
| LRP | 141 (58.0) | 16 (55.2) | 31 (60.8) | 94 (57.7) | 0.644 | 0.801 | 0.718 | 0.747 | 0.904 |
| Lipid length, mm | 9.0 (5.8-13.0) | 5.0 (2.0-10.8) | 7.2 (4.7-14.2) | 9.0 (6.8-13.0) | 0.352 | 0.128 | 0.419 | 0.157 | 0.158 |
| Mean lipid arc, ° | 163.0 (134.3-201.0) | 126.8 (112.4-171.4) | 150.9 (136.5-209.8) | 174.2 (137.0-194.9) | 0.097 | **0.032** | 0.879 | **0.033** | 0.258 |
| Maximum lipid arc, ° | 229.8 (184.2-293.5) | 178.1 (133.5-268.0) | 222.5 (182.8-289.2) | 243.4 (193.4-300.6) | 0.281 | 0.130 | 0.684 | 0.147 | 0.256 |
| Lipid index | 1448.5 (890.6-2255.2) | 627.8 (244.2-2110.9) | 1149.8 (849.0-2194.4) | 1542.7 (1069.5-2257.6) | 0.143 | **0.025** | 0.674 | **0.030** | 0.190 |
| Minimal FCT, μm | 73.3 (60.7-86.8) | 85.2 (70.2-88.5) | 76.7 (70.0-83.3) | 69.0 (57.5-84.0) | 0.735 | 0.088 | 0.160 | 0.149 | 0.070 |
| TCFA | 47 (19.3) | 3 (10.3) | 7 (13.7) | 37 (22.7) | 0.671 | 0.060 | 0.185 | 0.175 | 0.069 |
| Macrophage | 196 (80.7) | 18 (62.1) | 36 (70.6) | 142 (87.1) | 0.417 | 0.011 | 0.066 | 0.006 | 0.001 |
| Microvessels | 73 (30.0) | 7 (24.1) | 9 (17.6) | 57 (35.0) | 0.531 | 0.230 | 0.030 | 0.452 | 0.020 |
| Cholesterol crystals | 162 (66.7) | 11 (37.9) | 26 (51.0) | 125 (76.7) | 0.348 | 0.001 | 0.011 | 0.002 | <0.001 |
| thrombus | 88 (36.2) | 15 (51.7) | 12 (23.5) | 61 (37.4) | 0.028 | 0.193 | 0.081 | 0.089 | 0.661 |
| Thrombus length | 6.7 (3.0-12.4) | 3.0 (2.2-8.0) | 9.3 (5.1-14.0) | 7.2 (3.4-13.0) | 0.149 | 0.128 | 0.765 | 0.104 | 0.337 |
| Spotty calcific plaque | 93 (38.3) | 2 (6.9) | 6 (11.8) | 85 (52.1) | 0.462 | <0.001 | <0.001 | 0.002 | <0.001 |
| Calcium length, mm | 3.6 (2.0-7.6) |  |  | 3.6 (2.0-7.6) |  |  |  |  |  |
| Maximal calcium arc, ◦ | 172.4 (125.0-237.6) |  |  | 172.4 (125.0-237.6) |  |  |  |  |  |
| Minimal calcium depth, µm | 10.0 (10.0-10.0) |  |  | 10.0 (10.0-10.0) |  |  |  |  |  |

Values are n (%) or median (IQR). A *P*-value < 0.05 was considered statistically significant, shown in **bold**. Abbreviations as shown in Supplemental Table 1.

**Supplementary Table 2A. Multivariate Logistic Regression Analysis of Nonculprit PE.**

|  | **Univariate analysis** | | **Multivariate analysis** | |
| --- | --- | --- | --- | --- |
| OR (95%CI) | *P* value | OR (95%CI) | *P* value |
| Age |  |  |  |  |
| Group T1 | 1 (Reference) |  | 1 (Reference) |  |
| Group T2 | 0.23 (0.08-0.66) | 0.006 | 0.23 (0.08-0.66) | 0.006 |
| Group T3 | 0.46 (0.20-1.02) | 0.057 | 0.46 (0.20-1.02) | 0.057 |
| Smokers | 0.86 (0.44-1.71) | 0.670 |  |  |
| Hypertension | 0.97 (0.55-1.72) | 0.928 |  |  |
| Diabetes mellitus | 0.60 (0.31-1.17) | 0.133 |  |  |
| CKD | 1.10 (0.21-5.81) | 0.912 |  |  |
| Previous MI | 0.81 (0.22-3.05) | 0.759 |  |  |
| STEMI | 1.61 (0.81-3.20) | 0.174 |  |  |
| TC | 0.99 (0.99-1.00) | 0.602 |  |  |
| TG | 1.00 (0.99-1.00) | 0.965 |  |  |
| LDL | 0.99 (0.99-1.01) | 0.512 |  |  |
| HDL | 1.00 (0.98-1.03) | 0.817 |  |  |
| hs-CRP | 0.99 (0.94-1.05) | 0.881 |  |  |
| D-dimer | 1.00 (0.99-1.00) | 0.720 |  |  |
| Urea | 1.05 (0.91-1.21) | 0.527 |  |  |
| Crea | 0.99 (0.97-1.01) | 0.211 |  |  |

Values are OR (95%CI). CI = confidence interval; OR = odds ratio. Other abbreviations as shown in Table 1.

**Supplementary Table 2B. Multivariate Logistic Regression Analysis of Nonculprit Fibrous Plaque.**

|  | **Univariate analysis** | | **Multivariate analysis** | |
| --- | --- | --- | --- | --- |
| OR (95%CI) | *P* value | OR (95%CI) | *P* value |
| Age |  |  |  |  |
| Group T1 | 1 (Reference) |  | 1 (Reference) |  |
| Group T2 | 0.93 (0.34-2.49) | 0.879 | 1.16 (0.41-3.24) | 0.782 |
| Group T3 | 0.35 (0.14-0.86) | 0.022 | 0.51 (0.19-1.38) | 0.184 |
| Smokers | 1.37 (0.66-2.83) | 0.394 |  |  |
| Hypertension | 0.52 (0.27-1.00) | 0.051 | 0.62 (0.31-1.26) | 0.188 |
| Diabetes mellitus | 0.74 (0.35-1.55) | 0.417 |  |  |
| CKD | 0.71 (0.08-6.02) | 0.751 |  |  |
| Previous MI | 0.77 (0.16-3.59) | 0.738 |  |  |
| STEMI | 0.73 (0.30-1.75) | 0.477 |  |  |
| TC | 0.99 (0.99-1.00) | 0.503 |  |  |
| TG | 0.99 (0.99-1.00) | 0.144 |  |  |
| LDL | 0.99 (0.99-1.01) | 0.824 |  |  |
| HDL | 1.02 (0.99-1.05) | 0.292 |  |  |
| hs-CRP | 0.93 (0.83-1.05) | 0.243 |  |  |
| D-dimer | 1.00 (0.99-1.00) | 0.374 |  |  |
| Urea | 0.85 (0.71-1.03) | 0.093 | 0.94 (0.76-1.16) | 0.556 |
| Crea | 0.98 (0.96-1.00) | 0.064 | 0.99 (0.97-1.02) | 0.543 |

Values are OR (95%CI). CI = confidence interval; OR = odds ratio. Other abbreviations as shown in Table 1.

**Supplementary Table 2C. Multivariate Logistic Regression Analysis of Nonculprit Spotty Calcific Plaque.**

|  | **Univariate analysis** | | **Multivariate analysis** | |
| --- | --- | --- | --- | --- |
| OR (95%CI) | *P* value | OR (95%CI) | *P* value |
| Age |  |  |  |  |
| Group T1 | 1 (Reference) |  | 1 (Reference) |  |
| Group T2 | 1.80 (0.34-9.56) | 0.490 | 1.76 (0.31-10.20) | 0.526 |
| Group T3 | 14.71 (3.39-63.91) | <0.001 | 18.87 (3.80-93.84) | <0.001 |
| Smokers | 0.84 (0.45-1.55) | 0.572 |  |  |
| Hypertension | 1.70 (1.00-2.89) | 0.048 | 0.92 (0.48-1.76) | 0.804 |
| Diabetes mellitus | 2.55 (1.44-4.50) | 0.001 | 2.67 (1.31-5.44) | 0.007 |
| CKD | 1.22 (0.27-5.56) | 0.800 |  |  |
| Previous MI | 2.73 (0.87-8.61) | 0.087 | 4.42 (1.01-19.25) | 0.048 |
| STEMI | 0.93 (0.48-1.81) | 0.839 |  |  |
| TC | 0.99 (0.99-1.00) | 0.094 | 1.01 (0.99-1.02) | 0.585 |
| TG | 1.00 (0.99-1.00) | 0.371 |  |  |
| LDL | 0.99 (0.99-1.00) | 0.062 | 0.99 (0.98-1.01) | 0.452 |
| HDL | 0.97 (0.94-0.99) | 0.008 | 0.98 (0.95-1.02) | 0.333 |
| hs-CRP | 1.03 (0.98-1.09) | 0.276 |  |  |
| D-dimer | 1.00 (0.99-1.00) | 0.586 |  |  |
| Urea | 1.13 (0.98-1.29) | 0.084 | 0.93 (0.78-1.10) | 0.396 |
| Crea | 1.02 (1.00-1.04) | 0.018 | 0.99 (0.98-1.02) | 0.863 |

Values are OR (95%CI). CI = confidence interval; OR = odds ratio. Other abbreviations as shown in Table 1.

**Supplementary Table 2D. Multivariate Logistic Regression Analysis of Nonculprit Macrophage.**

|  | **Univariate analysis** | | **Multivariate analysis** | |
| --- | --- | --- | --- | --- |
| OR (95%CI) | *P* value | OR (95%CI) | *P* value |
| Age |  |  |  |  |
| Group T1 | 1 (Reference) |  | 1 (Reference) |  |
| Group T2 | 1.47 (0.56-3.84) | 0.435 | 1.52 (0.56-4.13) | 0.415 |
| Group T3 | 4.13 (1.72-9.95) | 0.002 | 4.28 (1.64-11.20) | 0.003 |
| Smokers | 0.76 (0.37-1.56) | 0.450 |  |  |
| Hypertension | 1.18 (0.62-2.23) | 0.618 |  |  |
| Diabetes mellitus | 1.07 (0.53-2.18) | 0.847 |  |  |
| CKD | 1.45 (0.17-12.36) | 0.733 |  |  |
| Previous MI | 0.79 (0.21-2.99) | 0.727 |  |  |
| STEMI | 1.17 (0.51-2.71) | 0.710 |  |  |
| TC | 1.01 (1.00-1.01) | 0.065 | 0.99 (0.97-1.01) | 0.356 |
| TG | 1.00 (0.99-1.01) | 0.122 |  |  |
| LDL | 1.01 (1.00-1.02) | 0.024 | 1.02 (1.00-1.05) | 0.055 |
| HDL | 0.98 (0.95-1.01) | 0.122 |  |  |
| hs-CRP | 1.03 (0.95-1.11) | 0.526 |  |  |
| D-dimer | 1.00 (0.99-1.00) | 0.206 |  |  |
| Urea | 1.09 (0.91-1.30) | 0.345 |  |  |
| Crea | 1.03 (1.00-1.05) | 0.025 | 1.02 (0.99-1.05) | 0.140 |

Values are OR (95%CI). CI = confidence interval; OR = odds ratio. Other abbreviations as shown in Table 1.

**Supplementary Table 2E. Multivariate Logistic Regression Analysis of Nonculprit Cholesterol Crystals.**

|  | **Univariate analysis** | | **Multivariate analysis** | |
| --- | --- | --- | --- | --- |
| OR (95%CI) | *P* value | OR (95%CI) | *P* value |
| Age |  |  |  |  |
| Group T1 | 1 (Reference) |  | 1 (Reference) |  |
| Group T2 | 1.70 (0.67-4.31) | 0.262 | 1.38 (0.49-3.93) | 0.542 |
| Group T3 | 5.38 (2.34-12.39) | <0.001 | 4.12 (1.52-11.18) | 0.005 |
| Smokers | 1.00 (0.53-1.88) | 1.000 |  |  |
| Hypertension | 1.82 (1.06-3.12) | 0.030 | 1.57 (0.78-3.13) | 0.204 |
| Diabetes mellitus | 2.84 (1.45-5.58) | 0.002 | 2.44 (1.13-5.28) | 0.024 |
| CKD | 0.66 (0.14-3.01) | 0.590 |  |  |
| Previous MI | 1.13 (0.34-3.79) | 0.840 |  |  |
| STEMI | 1.34 (0.66-2.71) | 0.419 |  |  |
| TC | 1.01 (1.00-1.01) | 0.011 | 1.01 (0.98-1.04) | 0.448 |
| TG | 1.01 (1.00-1.01) | 0.002 | 1.00 (0.99-1.01) | 0.668 |
| LDL | 1.01 (1.00-1.02) | 0.013 | 1.01 (0.98-1.04) | 0.744 |
| HDL | 0.96 (0.94-0.99) | 0.003 | 0.95 (0.90-0.99) | 0.034 |
| hs-CRP | 1.01 (0.96-1.07) | 0.684 |  |  |
| D-dimer | 1.00 (0.99-1.00) | 0.395 |  |  |
| Urea | 1.31 (1.11-1.54) | 0.001 | 1.17 (0.96-1.43) | 0.119 |
| Crea | 1.03 (1.01-1.04) | 0.009 | 0.99 (0.98-1.02) | 0.870 |

Values are OR (95%CI). CI = confidence interval; OR = odds ratio. Other abbreviations as shown in Table 1.

**Supplementary Table 2F. Multivariate Linear Regression Analysis of Nonculprit Mean Lipid Arc.**

|  | **Univariate analysis** | | **Multivariate analysis** | |
| --- | --- | --- | --- | --- |
| β-coefficient | *P* value | β-coefficient | *P* value |
| Age |  |  |  |  |
| Group T1 | 1 (Reference) |  | 1 (Reference) |  |
| Group T2 | 0.244 | 0.055 | 0.198 | 0.116 |
| Group T3 | 0.294 | 0.022 | 0.251 | 0.062 |
| Smokers | -0.162 | 0.054 | -0.217 | 0.015 |
| Hypertension | 0.149 | 0.078 | 0.063 | 0.460 |
| Diabetes mellitus | 0.073 | 0.389 |  |  |
| CKD | 0.150 | 0.076 | 0.127 | 0.128 |
| Previous MI | -0.132 | 0.120 |  |  |
| STEMI | 0.052 | 0.543 |  |  |
| TC | 0.179 | 0.034 | 0.252 | 0.005 |
| TG | 0.161 | 0.056 | 0.075 | 0.374 |
| LDL | 0.129 | 0.127 |  |  |
| HDL | -0.043 | 0.613 |  |  |
| hs-CRP | 0.124 | 0.279 |  |  |
| D-dimer | 0.009 | 0.913 |  |  |
| Urea | 0.145 | 0.087 | 0.040 | 0.656 |
| Crea | 0.138 | 0.103 |  |  |

Values are standardized regression coefficients (β). Other abbreviations as shown in Table 1.

**Supplementary Table 2G. Multivariate Linear Regression Analysis of Nonculprit Lipid Index.**

|  | **Univariate analysis** | | **Multivariate analysis** | |
| --- | --- | --- | --- | --- |
| β-coefficient | *P* value | β-coefficient | *P* value |
| Age |  |  |  |  |
| Group T1 | 1 (Reference) |  | 1 (Reference) |  |
| Group T2 | 0.187 | 0.143 | 0.116 | 0.365 |
| Group T3 | 0.253 | 0.048 | 0.200 | 0.123 |
| Smokers | -0.096 | 0.256 |  |  |
| Hypertension | 0.176 | 0.037 | 0.128 | 0.139 |
| Diabetes mellitus | 0.188 | 0.026 | 0.153 | 0.073 |
| CKD | 0.154 | 0.068 | 0.114 | 0.169 |
| Previous MI | -0.076 | 0.367 |  |  |
| STEMI | 0.099 | 0.244 |  |  |
| TC | 0.149 | 0.079 | 0.028 | 0.903 |
| TG | 0.064 | 0.449 |  |  |
| LDL | 0.148 | 0.081 | 0.168 | 0.462 |
| HDL | -0.073 | 0.387 |  |  |
| hs-CRP | 0.142 | 0.214 |  |  |
| D-dimer | 0.019 | 0.826 |  |  |
| Urea | 0.082 | 0.334 |  |  |
| Crea | 0.044 | 0.607 |  |  |

Values are standardized regression coefficients (β). Other abbreviations as shown in Table 1.
